# Supplementary material
Source: Research Square preprint supplement (doi:10.21203/rs.3.rs-9096833/v1)
Supplement: Supplementary file 1 [file 6d4561648b65b9c1d7c62a1a.docx]

## **SUPPLEMENTARY FILE 4: Data Extraction Tables for All Included Systematic Reviews and Longitudinal Study**

### **Table S4.1 Incisor-Specific Systematic Reviews (n=6)**

| **Author (Year)** | **Journal** | **Focus** | **Databases Searched** | **Studies Included** | **Participants** | **Key Findings** | **Quality** |
| --- | --- | --- | --- | --- | --- | --- | --- |
| Seehra et al. (2023) | Am J Orthod Dentofacial Orthop | Supernumerary-induced impaction | 8 databases | 15 studies | 1058 (68.9% male) | 76–100% successful eruption; delayed removal >12 months associated with worse outcomes (OR 0.13; 95% CI 0.03–0.50) | HIGH |
| Arriola-Guillén et al. (2024) | Int Orthod | Labially inverted incisors | 5 databases | 8 studies | Not pooled | Favorable outcomes; root resorption and gingival recession reported | MODERATE |
| Mockutė et al. (2022) | Medicina | Incisor morphology | 4 databases | 22 studies | Not pooled | Dilaceration in 25–40%; root abnormalities common; CBCT essential | HIGH |
| Žarovienė et al. (2021) | Medicina | Post-treatment outcomes | 5 databases | 15 studies | Not pooled | CBCT improves diagnosis; gingival recession common; permanent retention required | MODERATE |
| Alhafi et al. (2026) | Int Orthod | Traction-based management | 6 databases | 12 studies | Not pooled | Favorable outcomes with structured traction protocols | MODERATE |

### **Table S4.2 Landmark Longitudinal Study (Prognostic Factors)**

| **Author (Year)** | **Journal** | **Focus** | **Design** | **Participants** | **Key Findings** | **Quality (NOS)** |
| --- | --- | --- | --- | --- | --- | --- |
| Chaushu et al. (2015) | Am J Orthod Dentofacial Orthop | Prognostic factors | Retrospective cohort | 127 patients | Age, impaction depth, and dilaceration significantly affect prognosis and treatment duration | 7/9 |

### **Table S4.3 Canine/Applicable Systematic Reviews – Diagnostic Modalities (n=4)**

| **Author (Year)** | **Journal** | **Focus** | **Databases Searched** | **Studies Included** | **Key Findings** | **Quality** |
| --- | --- | --- | --- | --- | --- | --- |
| Mitsea et al. (2022) | Children | Root resorption (canine-induced) | 4 databases | 21 studies | CBCT detects resorption in 30–50% of lateral incisors adjacent to impacted canines | MODERATE |
| Grisar et al. (2019) | Clin Exp Dent Res | 3D classification | 3 databases | 16 studies | 3D classification systems improve treatment planning | LOW |
| Parkin et al. (2018) | Cochrane Database Syst Rev | Surgical exposure | Multiple | 5 studies | No clear superiority between open/closed; choice depends on clinical situation | HIGH |
| Dahlén et al. (2024) | Eur J Orthod | Root resorption | 4 databases | 12 studies | CBCT identifies resorption 6–12 months earlier than periapical radiographs | MODERATE |

### **Table S4.4 Canine/Applicable Systematic Reviews – Surgical Techniques (n=3)**

| **Author (Year)** | **Journal** | **Focus** | **Databases Searched** | **Studies Included** | **Key Findings** | **Quality** |
| --- | --- | --- | --- | --- | --- | --- |
| de Araujo et al. (2020) | Jpn Dent Sci Rev | Surgical-periodontal | 5 databases | 12 studies | Closed approach with apically positioned flap may reduce recession by ~0.9 mm | MODERATE |
| Mousa et al. (2022) | Cureus | Accelerated methods | 4 databases | 14 studies | Accelerated methods show no difference in outcomes compared with conventional | LOW |
| Seehra et al. (2026) | Orthod Craniofac Res | Gingival asymmetry | 5 databases | 8 studies | Asymmetry >1.5 mm detectable by laypersons | MODERATE |

### **Table S4.5 Canine/Applicable Systematic Reviews – Biomechanical Principles (n=3) + FEA Studies (n=3)**

| **Author (Year)** | **Journal** | **Focus** | **Studies Included** | **Key Findings** | **Quality** |
| --- | --- | --- | --- | --- | --- |
| Singh et al. (2016) | J Int Soc Prev Community Dent | FEA principles | Review article | FEA essential for understanding tooth movement biomechanics | LOW* |
| Yang et al. (2024) | BMC Oral Health | Force direction | FEA study | Optimal force vector at 20–30° from long axis reduces apical stress | LOW* |
| Xia et al. (2022) | Front Bioeng Biotechnol | Aligner biomechanics | FEA study | Clear aligners produce different stress patterns than fixed appliances | LOW* |
| Zeno et al. (2019) | Angle Orthod | Adjacent tooth stress | FEA study | Adjacent teeth experience significant stress during canine traction | LOW* |

*FEA studies rated as low-certainty evidence (biomechanical simulations, not clinical outcome evidence)

### **Table S4.6 Canine/Applicable Systematic Reviews – Periodontal Outcomes (n=3)**

| **Author (Year)** | **Journal** | **Focus** | **Databases Searched** | **Studies Included** | **Key Findings** | **Quality** |
| --- | --- | --- | --- | --- | --- | --- |
| Mattos et al. (2022) | Korean J Orthod | Periodontal outcomes | 6 databases | 18 studies | Mean recession ~0.9 mm at 3 years; keratinized tissue reduced | HIGH |
| Caprioglio et al. (2019) | Prog Orthod | Impaction severity | 4 databases | 12 studies | Severity correlates with periodontal compromise | MODERATE |
| Farronato et al. (2014) | Prog Orthod | Dilacerated incisors | 3 databases | 8 studies | Dilacerated incisors have higher recession risk | LOW |

### **Table S4.7 Canine/Applicable Systematic Reviews – Root Resorption (n=3)**

| **Author (Year)** | **Journal** | **Focus** | **Databases Searched** | **Studies Included** | **Key Findings** | **Quality** |
| --- | --- | --- | --- | --- | --- | --- |
| Becker et al. (2013) | Angle Orthod | Treatment failure | 3 databases | 14 studies | Ankylosis and root resorption are main causes of failure | MODERATE |
| Consolaro et al. (2022) | Dental Press J Orthod | External apical resorption | 4 databases | 10 studies | Early detection prevents progression | LOW |
| Nayyer et al. (2022) | J Oral Biol Craniofac Res | Photobiomodulation | 5 databases | 12 studies | Photobiomodulation may reduce resorption | MODERATE |

### **Table S4.8 Canine/Applicable Systematic Reviews – Retention/Relapse (n=3)**

| **Author (Year)** | **Journal** | **Focus** | **Databases Searched** | **Studies Included** | **Key Findings** | **Quality** |
| --- | --- | --- | --- | --- | --- | --- |
| Yu et al. (2013) | Cochrane Database Syst Rev | Relapse prevention | Multiple | 11 studies | Fixed retention superior to removable; lifetime retention recommended | HIGH |
| Littlewood et al. (2016) | Cochrane Database Syst Rev | Retention procedures | Multiple | 15 studies | No clear evidence for optimal retention protocol | HIGH |
| Ciavarella et al. (2023) | Medicina | Reverse pin | 4 databases | 8 studies | Reverse pin effective for retention in specific cases | LOW |

### **Table S4.9 Canine/Applicable Systematic Reviews – Ankylosis (n=3)**

| **Author (Year)** | **Journal** | **Focus** | **Design** | **Participants** | **Key Findings** | **Quality** |
| --- | --- | --- | --- | --- | --- | --- |
| Cernochova et al. (2024) | BMC Oral Health | Ankylosis prevalence | Retrospective cohort | 347 impacted teeth | Ankylosis in 5–15%; delayed diagnosis extends treatment by ~8 months | MODERATE |
| Nemec et al. (2024) | Prog Orthod | Ankylosis risk factors | Retrospective cohort | 412 patients | Risk factors: trauma (OR 4.2), age >25 (OR 2.8), complete bony impaction (OR 3.1) | MODERATE |
| de Souza et al. (2015) | Cochrane Database Syst Rev | Interventions for ankylosed teeth | Systematic review | 5 studies | Decoronation recommended for ankylosed teeth | HIGH |

### **Table S4.10 Additional Systematic Review**

| **Author (Year)** | **Journal** | **Focus** | **Databases Searched** | **Studies Included** | **Key Findings** | **Quality** |
| --- | --- | --- | --- | --- | --- | --- |
| Wolny et al. (2025) | J Clin Med | Aligner treatment for impacted canines | 5 databases | 18 studies | Clear aligners may be effective for selected impactions; limited evidence | MODERATE |
