# Supplementary material
Source: Research Square preprint supplement (doi:10.21203/rs.3.rs-9096833/v1)
Supplement: Supplementary file 2 [file 7ca180a55798d35e9791f02f.docx]

# **SUPPLEMENTARY FILE 2: Newcastle-Ottawa Scale Assessment for Chaushu et al. (2015)**

## **Reference:**

Chaushu S, Becker T, Becker A. Impacted central incisors: factors affecting prognosis and treatment duration. Am J Orthod Dentofacial Orthop. 2015;147(3):355-62. [10]

## **Table S2.1 Newcastle-Ottawa Quality Assessment Scale – Cohort Study**

| **Category** | **Item** | **Response** | **Score** |
| --- | --- | --- | --- |
| **SELECTION** |  |  | **(Maximum 4 stars)** |
| 1 | Representativeness of the exposed cohort | Truly representative of the average patient with impacted maxillary incisors in the community | ★ |
| 2 | Selection of the non-exposed cohort | Drawn from the same community as the exposed cohort | ★ |
| 3 | Ascertainment of exposure | Secure record (dental records and radiographs) | ★ |
| 4 | Demonstration that outcome of interest was not present at start of study | Yes (all patients had impacted incisors at baseline) | ★ |
| **COMPARABILITY** |  |  | **(Maximum 2 stars)** |
| 1 | Comparability of cohorts on the basis of the design or analysis | Study controls for age and impaction type | ★ |
| 2 | Study controls for additional factor (dilaceration) | Yes | ★ |
| **OUTCOME** |  |  | **(Maximum 3 stars)** |
| 1 | Assessment of outcome | Independent blind assessment (radiographic evaluation) | ★ |
| 2 | Was follow-up long enough for outcomes to occur? | Yes (minimum 2 years follow-up) | ★ |
| 3 | Adequacy of follow-up of cohorts | Complete follow-up (all subjects accounted for) | ★ |
| **TOTAL SCORE** |  |  | **7/9** |

## **Table S2.2 Detailed Quality Assessment**

| **Criteria** | **Assessment** | **Comments** |
| --- | --- | --- |
| **Study Design** | Retrospective cohort | Longitudinal analysis of 127 patients with impacted maxillary incisors |
| **Population** | 127 patients (mean age at treatment initiation) | Clear inclusion/exclusion criteria |
| **Exposure** | Orthodontic traction following surgical exposure | Standardized protocol |
| **Outcomes** | Treatment duration, success rate, prognostic factors | Clearly defined |
| **Follow-up** | Complete follow-up | All patients accounted for |
| **Confounding** | Age, impaction depth, dilaceration considered | Multivariate analysis performed |
| **Overall Quality** | Good | Score 7/9 indicates good quality |
