# Supplementary material
Source: Research Square preprint supplement (doi:10.21203/rs.3.rs-9096833/v1)
Supplement: Supplementary file 3 [file 91a4cacf2a5a6aa5ff904602.docx]

# **SUPPLEMENTARY FILE 3: Open Access Search Engines Database**

## **IMPORTANT NOTE ON ACCESS**

**This review used only open access resources.** Institutional subscription access to Scopus and Web of Science was NOT available. All resources listed below are freely accessible without subscription.

## **Table S3.1 Primary Open Access Search Engines and Databases**

| **Search Engine / Database** | **URL** | **Access** | **Coverage** | **Best For** |
| --- | --- | --- | --- | --- |
| **PubMed** | pubmed.[ncbi.nlm.nih.gov](https://ncbi.nlm.nih.gov/) | Free | 35M+ citations; MEDLINE | Primary biomedical literature; MeSH searching |
| **PubMed Central (PMC)** | [ncbi.nlm.nih.gov/pmc](https://ncbi.nlm.nih.gov/pmc) | Free | 8M+ full-text articles | Free full-text access |
| **Google Scholar** | [scholar.google.com](https://scholar.google.com/) | Free | Multidisciplinary | Citation tracking; broad search |
| **Epistemonikos** | [epistemonikos.org](https://epistemonikos.org/) | Free | 300,000+ systematic reviews | Systematic review database |
| **Cochrane Library** | [cochranelibrary.com](https://cochranelibrary.com/) | Free abstracts | Systematic reviews | Gold standard systematic reviews |
| **DOAJ (Directory of Open Access Journals)** | [doaj.org](https://doaj.org/) | Free | 20,000+ OA journals | Quality-controlled open access journals |
| **BioMed Central** | [biomedcentral.com](https://biomedcentral.com/) | Free | 300+ peer-reviewed journals | Open access biomedical research |
| **Frontiers** | [frontiersin.org](https://frontiersin.org/) | Free | Peer-reviewed OA journals | Open access scientific journals |

## **Table S3.2 Open Access Dental Journals Relevant to Impacted Incisor Research**

| **Journal** | **Publisher** | **ISSN** | **Impact Factor (approx.)** | **Open Access Model** |
| --- | --- | --- | --- | --- |
| **Progress in Orthodontics** | SpringerOpen | 2196-1042 | 3.5 | Fully open access |
| **BMC Oral Health** | BioMed Central | 1472-6831 | 2.5 | Fully open access |
| **Head & Face Medicine** | BioMed Central | 1746-160X | 2.8 | Fully open access |
| **Medicina** | MDPI | 1648-9144 | 2.6 | Fully open access |
| **Children** | MDPI | 2227-9067 | 2.4 | Fully open access |
| **Diagnostics** | MDPI | 2075-4418 | 3.0 | Fully open access |
| **Journal of Orthodontic Science** | Wolters Kluwer | 2278-0203 | 1.2 | Fully open access |
| **Contemporary Clinical Dentistry** | Wolters Kluwer | 0976-237X | 1.1 | Fully open access |
| **Clinical Case Reports** | Wiley | 2050-0904 | 0.9 | Fully open access |
| **Frontiers in Oral Health** | Frontiers | 2673-4842 | New | Fully open access |

## **Table S3.3 Search Strategy Results from Open Access Databases (March 5, 2026)**

| **Database** | **Search String** | **Results** | **Incisor-Specific SRs Identified** |
| --- | --- | --- | --- |
| **PubMed** | ("impacted maxillary incisor"[Title/Abstract] OR "unerupted incisor"[Title/Abstract]) AND ("systematic review"[pt] OR "meta-analysis"[pt]) | 156 | Seehra 2023 [5], Arriola-Guillén 2024 [6], Mockutė 2022 [7], Žarovienė 2021 [8], Alhafi 2026 [9], Seehra 2026 [38] |
| **Epistemonikos** | (impacted maxillary incisor) OR (unerupted incisor) | 189 | Confirmed above |
| **Cochrane Library** | ("impacted incisor" OR "unerupted incisor") in Title Abstract Keyword | 49 | 0 incisor-specific |
| **Google Scholar** | ("impacted maxillary incisor" orthodontic traction systematic review) | ~1,890 (first 200 screened) | Alhafi 2026 [9] (also in PubMed) |

## **Table S3.4 Systematic Review and Evidence Synthesis Resources (Open Access)**

| **Resource** | **URL** | **Access** | **Description** | **Best For** |
| --- | --- | --- | --- | --- |
| **PROSPERO** | [crd.york.ac.uk/prospero](https://crd.york.ac.uk/prospero) | Free | International prospective register of systematic reviews | Identify ongoing/protocol SRs |
| **Epistemonikos** | [epistemonikos.org](https://epistemonikos.org/) | Free | Database of systematic reviews | Comprehensive SR search |
| **JBI Database of Systematic Reviews** | [joannabriggs.org](https://joannabriggs.org/) | Free abstracts | Systematic reviews for healthcare | Evidence-based practice |
| **Evidence-Based Dentistry Journal** | [nature.com/ebd](https://nature.com/ebd) | Free abstracts | Journal dedicated to evidence-based dentistry | Critical summaries |
| **Campbell Collaboration** | [campbellcollaboration.org](https://campbellcollaboration.org/) | Free | Systematic reviews in social sciences | Educational interventions |
| **Centre for Evidence-Based Dentistry** | [cebd.org](https://cebd.org/) | Free | Resources and tools for evidence-based practice | CAT library |

## **Table S3.5 Regional and Institutional Open Access Repositories**

| **Repository** | **URL** | **Access** | **Region** | **Content Type** |
| --- | --- | --- | --- | --- |
| **LILACS** | [lilacs.bvsalud.org/en](https://lilacs.bvsalud.org/en) | Free | Latin America and Caribbean | Scientific and technical literature |
| **SciELO** | [scielo.org](https://scielo.org/) | Free | Latin America, Spain, Portugal, South Africa | Peer-reviewed journals |
| **OpenGrey** | [opengrey.eu](https://opengrey.eu/) | Free | Europe | Grey literature; technical reports |
| **BASE (Bielefeld Academic Search Engine)** | [base-search.net](https://base-search.net/) | Free | International | Academic web search |
| **CORE** | [core.ac.uk](https://core.ac.uk/) | Free | International | Aggregates repository content worldwide |

## **Table S3.6 Training Resources for Literature Searching (Open Access)**

| **Resource** | **URL** | **Access** | **Description** |
| --- | --- | --- | --- |
| **NCBI Education** | [ncbi.nlm.nih.gov/home/training](https://ncbi.nlm.nih.gov/home/training) | Free | Tutorials for NCBI databases |
| **Cochrane Interactive Learning** | [training.cochrane.org](https://training.cochrane.org/) | Free modules | Systematic review methodology |
| **PubMed Online Training** | [learn.pubmed.gov](https://learn.pubmed.gov/) | Free | Interactive PubMed tutorials |
| **PRISMA Statement Website** | [prisma-statement.org](https://prisma-statement.org/) | Free | Reporting guidelines |
| **PRIOR Statement** | [prior-statement.org](https://prior-statement.org/) | Free | Umbrella review reporting |
| **EQUATOR Network** | [equator-network.org](https://equator-network.org/) | Free | Reporting guidelines |

## **Table S3.7 Critical Appraisal Tools Available Online (Open Access)**

| **Tool** | **URL** | **Access** | **Purpose** |
| --- | --- | --- | --- |
| **AMSTAR-2** | [amstar.ca](https://amstar.ca/) | Free | Quality assessment of systematic reviews |
| **ROBIS** | [riskofbias.info](https://riskofbias.info/) | Free | Risk of bias in systematic reviews |
| **Newcastle-Ottawa Scale** | [ohri.ca/programs/clinical_epidemiology/oxford.asp](https://ohri.ca/programs/clinical_epidemiology/oxford.asp) | Free | Quality assessment of cohort studies |
| **Cochrane RoB 2** | [methods.cochrane.org/risk-bias-2](https://methods.cochrane.org/risk-bias-2) | Free | Risk of bias for RCTs |
| **NIH Quality Assessment Tools** | [nhlbi.nih.gov/health-topics/study-quality-assessment-tools](https://nhlbi.nih.gov/health-topics/study-quality-assessment-tools) | Free | Various study designs |
| **GRADE** | [gradeworkinggroup.org](https://gradeworkinggroup.org/) | Free | Grading of evidence |

## **Table S3.8 Key MeSH Terms for Open Access Searching (2026)**

| **MeSH Term** | **Tree Number** | **Scope Note** | **Entry Terms** |
| --- | --- | --- | --- |
| **Tooth, Impacted** | C07.793.900 | A tooth that is prevented from erupting by a physical barrier | Impacted tooth; Embedded tooth |
| **Incisor** | A14.254.860.500 | Any of the eight front teeth | Central incisor; Maxillary incisor |
| **Tooth, Unerupted** | C07.793.700 | A tooth that has not erupted through the gingiva | Unerupted tooth |
| **Orthodontic Extrusion** | E06.658.453.500 | Orthodontic movement of a tooth in an occlusal direction | Orthodontic traction; Forced eruption |
| **Root Resorption** | C07.793.734 | Loss of tooth root structure | External root resorption |
| **Tooth Ankylosis** | C07.793.601 | Fusion of tooth cementum or dentin with alveolar bone | Ankylosed tooth |
