# Supplementary material
Source: Research Square preprint supplement (doi:10.21203/rs.3.rs-9096833/v1)
Supplement: Supplementary file 4 [file 94e3f73c625c7bbe4088a514.docx]

# **SUPPLEMENTARY FILE 1: AMSTAR-2 Quality Assessments for All Included Systematic Reviews**

## **Instructions for AMSTAR-2 Assessment**

AMSTAR-2 rates overall confidence based on critical and non-critical item failures:

| **Rating** | **Definition** |
| --- | --- |
| **HIGH** | No or one non-critical weakness |
| **MODERATE** | More than one non-critical weakness |
| **LOW** | One critical flaw with or without non-critical weaknesses |
| **CRITICALLY LOW** | More than one critical flaw with or without non-critical weaknesses |

**Critical domains** (items 2, 4, 7, 9, 11, 13, 15):

- Item 2: Protocol registered before commencement
- Item 4: Adequacy of literature search
- Item 7: List of excluded studies with justification
- Item 9: Risk of bias from individual studies
- Item 11: Appropriateness of meta-analytical methods
- Item 13: Consideration of risk of bias when interpreting results
- Item 15: Assessment of publication bias

## **Table S1.1 Incisor-Specific Systematic Reviews (n=6)**

| **AMSTAR-2 Item** | **Seehra 2023 [5]** | **Arriola-Guillén 2024 [6]** | **Mockutė 2022 [7]** | **Žarovienė 2021 [8]** | **Alhafi 2026 [9]** | **Seehra 2026 [38]** |
| --- | --- | --- | --- | --- | --- | --- |
| 1. PICO in research questions | Yes | Yes | Yes | Yes | Yes | Yes |
| 2. Protocol registered* | Yes (PROSPERO) | Yes | No | No | Yes | Yes (PROSPERO) |
| 3. Study design justification | Yes | Yes | Yes | Yes | Yes | Yes |
| 4. Comprehensive search* | Yes (8 databases) | Yes (5 databases) | Yes (4 databases) | Yes (5 databases) | Yes (6 databases) | Yes (6 databases) |
| 5. Duplicate study selection | Yes | Yes | Yes | Yes | Yes | Yes |
| 6. Duplicate data extraction | Yes | Yes | Yes | Yes | Yes | Yes |
| 7. List of excluded studies* | Yes | No | Yes | No | Yes | Yes |
| 8. Included studies described | Yes | Yes | Yes | Yes | Yes | Yes |
| 9. Risk of bias assessment* | Yes (ROBINS-I) | Yes | Yes | Yes | Yes | Yes |
| 10. Funding sources reported | Yes | Yes | Yes | No | Yes | Yes |
| 11. Appropriate meta-analysis* | Yes | N/A | N/A | N/A | Yes | N/A |
| 12. Risk of bias in meta-analysis | Yes | N/A | N/A | N/A | Yes | N/A |
| 13. Risk of bias in interpretation* | Yes | Yes | Yes | Yes | Yes | Yes |
| 14. Heterogeneity discussed | Yes | Yes | Yes | Yes | Yes | Yes |
| 15. Publication bias assessed* | Yes | N/A | N/A | N/A | Yes | N/A |
| 16. Conflict of interest stated | Yes | Yes | Yes | Yes | Yes | Yes |
| **Overall Confidence** | **HIGH** | **MODERATE** | **HIGH** | **MODERATE** | **MODERATE** | **MODERATE** |

## **Table S1.2 Canine/Applicable Systematic Reviews (n=14)**

| **AMSTAR-2 Item** | **Mitsea 2022 [33]** | **Parkin 2018 [23]** | **de Araujo 2020 [24]** | **Mousa 2022 [22]** | **Mattos 2022 [28]** | **Caprioglio 2019 [29]** | **Silva 2017 [30]** |
| --- | --- | --- | --- | --- | --- | --- | --- |
| 1. PICO | Yes | Yes | Yes | Yes | Yes | Yes | Yes |
| 2. Protocol* | No | Yes (Cochrane) | No | No | No | No | No |
| 3. Design justification | Yes | Yes | Yes | Yes | Yes | Yes | Yes |
| 4. Search comprehensive* | Yes | Yes | Yes | Partial | Yes | Partial | Partial |
| 5. Duplicate selection | Yes | Yes | Yes | Yes | Yes | Yes | Yes |
| 6. Duplicate extraction | Yes | Yes | Yes | Yes | Yes | Yes | Yes |
| 7. Excluded studies list* | No | Yes | No | No | Yes | No | No |
| 8. Studies described | Yes | Yes | Yes | Partial | Yes | Yes | Yes |
| 9. Risk of bias assessment* | Yes | Yes | Yes | No | Yes | Yes | Yes |
| 10. Funding reported | No | Yes | Yes | No | Yes | Yes | Yes |
| 11. Meta-analysis appropriate* | Yes | N/A | Yes | N/A | Yes | N/A | N/A |
| 12. Risk of bias in MA | Yes | N/A | Yes | N/A | Yes | N/A | N/A |
| 13. Risk of bias interpretation* | Yes | Yes | Yes | Partial | Yes | Yes | Yes |
| 14. Heterogeneity discussed | Yes | Yes | Yes | Yes | Yes | Yes | Yes |
| 15. Publication bias* | Yes | N/A | Yes | N/A | Yes | N/A | N/A |
| 16. Conflict of interest | Yes | Yes | Yes | Yes | Yes | Yes | Yes |
| **Overall Confidence** | **MODERATE** | **HIGH** | **MODERATE** | **LOW** | **HIGH** | **MODERATE** | **MODERATE** |

## **Table S1.2 Canine/Applicable Systematic Reviews (continued)**

| **AMSTAR-2 Item** | **El 2020 [32]** | **Nayyer 2022 [36]** | **Grisar 2019 [37]** | **Farronato 2014 [31]** | **Yu 2013 [44]** | **Littlewood 2016 [45]** | **Wolny 2025 [46]** |
| --- | --- | --- | --- | --- | --- | --- | --- |
| 1. PICO | Yes | Yes | Yes | Yes | Yes | Yes | Yes |
| 2. Protocol* | No | Yes | No | No | Yes (Cochrane) | Yes (Cochrane) | Yes |
| 3. Design justification | Yes | Yes | Yes | Yes | Yes | Yes | Yes |
| 4. Search comprehensive* | Partial | Yes | Partial | Partial | Yes | Yes | Yes |
| 5. Duplicate selection | Yes | Yes | No | Yes | Yes | Yes | Yes |
| 6. Duplicate extraction | Yes | Yes | No | Yes | Yes | Yes | Yes |
| 7. Excluded studies list* | No | Yes | No | No | Yes | Yes | Yes |
| 8. Studies described | Yes | Yes | Partial | Yes | Yes | Yes | Yes |
| 9. Risk of bias assessment* | Yes | Yes | No | No | Yes | Yes | Yes |
| 10. Funding reported | Yes | Yes | No | No | Yes | Yes | Yes |
| 11. Meta-analysis appropriate* | N/A | Yes | N/A | N/A | Yes | Yes | Yes |
| 12. Risk of bias in MA | N/A | Yes | N/A | N/A | Yes | Yes | Yes |
| 13. Risk of bias interpretation* | Yes | Yes | Partial | Partial | Yes | Yes | Yes |
| 14. Heterogeneity discussed | Yes | Yes | Yes | Yes | Yes | Yes | Yes |
| 15. Publication bias* | N/A | Yes | N/A | N/A | Yes | Yes | Yes |
| 16. Conflict of interest | Yes | Yes | Yes | Yes | Yes | Yes | Yes |
| **Overall Confidence** | **MODERATE** | **MODERATE** | **LOW** | **LOW** | **HIGH** | **HIGH** | **MODERATE** |

## **Table S1.3 Summary of AMSTAR-2 Ratings for All Included Systematic Reviews**

| **Systematic Review** | **Focus** | **Tooth Type** | **AMSTAR-2 Rating** |
| --- | --- | --- | --- |
| Seehra 2023 [5] | Supernumerary-induced impaction | Incisor | HIGH |
| Arriola-Guillén 2024 [6] | Labially inverted incisors | Incisor | MODERATE |
| Mockutė 2022 [7] | Incisor morphology | Incisor | HIGH |
| Žarovienė 2021 [8] | Post-treatment outcomes | Incisor | MODERATE |
| Alhafi 2026 [9] | Traction-based management | Incisor | MODERATE |
| Seehra 2026 [38] | Aesthetic outcomes | Incisor | MODERATE |
| Mitsea 2022 [33] | Root resorption | Canine | MODERATE |
| Parkin 2018 [23] | Surgical exposure | Canine | HIGH |
| de Araujo 2020 [24] | Surgical-periodontal | Canine | MODERATE |
| Mousa 2022 [22] | Accelerated methods | Canine | LOW |
| Mattos 2022 [28] | Periodontal outcomes | Canine | HIGH |
| Caprioglio 2019 [29] | Impaction severity | Canine | MODERATE |
| Silva 2017 [30] | Root length | Canine | MODERATE |
| El 2020 [32] | Mucogingival changes | Canine | MODERATE |
| Nayyer 2022 [36] | Photobiomodulation | Mixed | MODERATE |
| Grisar 2019 [37] | 3D classification | Canine | LOW |
| Farronato 2014 [31] | Longitudinal outcomes | Incisor | LOW |
| Yu 2013 [44] | Relapse prevention | Mixed | HIGH |
| Littlewood 2016 [45] | Retention | Mixed | HIGH |
| Wolny 2025 [46] | Aligner treatment | Canine | MODERATE |
