# Supplementary material
Source: Research Square preprint supplement (doi:10.21203/rs.3.rs-9096833/v1)
Supplement: Supplementary file 5 [file d927699f277cde20aa920d4d.docx]

# **SUPPLEMENTARY FILE 6: PRIOR (Preferred Reporting Items for Overviews of Reviews) Checklist**

| **Section/Topic** | **Item** | **Checklist Item** | **Reported on Page** |
| --- | --- | --- | --- |
| **TITLE** |  |  |  |
| Title | 1 | Identify the report as an overview of reviews (umbrella review). | Title page |
| **ABSTRACT** |  |  |  |
| Abstract | 2 | Provide a structured abstract including background, objectives, methods, results, and conclusions. | Abstract |
| **INTRODUCTION** |  |  |  |
| Rationale | 3 | Describe the rationale for the overview in the context of existing knowledge. | Background |
| Objectives | 4 | Provide an explicit statement of the objective(s) or question(s) the overview addresses. | Background |
| **METHODS** |  |  |  |
| Eligibility criteria | 5 | Specify the inclusion and exclusion criteria for the overview, including criteria for included reviews (e.g., PICO, study design, quality). | Methods |
| Information sources | 6 | Specify all databases, registers, websites, and other sources searched to identify reviews. Specify the date when each source was last searched. | Methods |
| Search strategy | 7 | Present the full search strategies for all databases, including any filters and limits used. | Methods |
| Selection process | 8 | Specify the methods used to decide whether a review met the inclusion criteria, including how many reviewers screened and selected reviews. | Methods |
| Data collection process | 9 | Specify the methods used to collect data from reviews, including how many reviewers collected data, whether they worked independently, and any processes for obtaining or confirming data. | Methods |
| Data items | 10 | List and define all outcomes and other variables for which data were sought. Describe any assumptions made about missing or unclear information. | Methods |
| Risk of bias assessment | 11 | Specify the methods used to assess risk of bias or methodological quality in the included reviews (e.g., AMSTAR-2, ROBIS). | Methods |
| Synthesis methods | 12 | Describe the methods used to synthesize results from included reviews, including any methods used to handle overlap in primary studies. | Methods |
| Certainty assessment | 13 | Describe any methods used to assess certainty (or confidence) in the body of evidence across reviews. | Methods |
| **RESULTS** |  |  |  |
| Study selection | 14 | Describe the results of the search and selection process, from number of records identified to number of reviews included, ideally using a flow diagram. | Results, Figure 1 |
| Study characteristics | 15 | Cite each included review and present its characteristics (e.g., PICO, number of primary studies, populations). | Results, Supp File 4 |
| Risk of bias in reviews | 16 | Present assessments of risk of bias or methodological quality for each included review. | Supp File 1 |
| Synthesis of results | 17 | For each synthesis, present the main findings, including any measures of effect, and the number and type of reviews contributing. | Results |
| Certainty of evidence | 18 | Present assessments of certainty (or confidence) in the body of evidence across reviews. | Results, Figure 2 |
| **DISCUSSION** |  |  |  |
| Summary of evidence | 19 | Summarize the main findings, including the strength of evidence for each main outcome. | Discussion |
| Limitations | 20 | Discuss any limitations of the overview and the included reviews. | Discussion |
| Interpretation | 21 | Provide a general interpretation of the results and important implications. | Discussion |
| **OTHER INFORMATION** |  |  |  |
| Registration and protocol | 22 | Provide registration information for the overview, or state that it was not registered. | Methods |
| Support | 23 | Describe sources of financial or non-financial support for the overview. | Declarations |
| Competing interests | 24 | Declare any competing interests of overview authors. | Declarations |
| Availability of data | 25 | Report which of the following are publicly available and where they can be found: extraction forms, data extracted from reviews, analytic code. | Declarations, Supp Files |
